# Supplementary material for: Molecular Mechanism Underlying Derepressed Male Production in Hexaploid Persimmon
Source: Front Plant Sci. 2020 Dec 22;11:567249. doi: 10.3389/fpls.2020.567249 (PMC7783364; doi:10.3389/fpls.2020.567249)
Supplement: Supplementary file 1 [file Data_Sheet_1.XLSX]

## Sheet: Sheet1
Gene ID	Gene name	avr. RPKM			highest hit in blastx with TAIR
		Kumemaru	Female		ID	Description	e-value
Dlo_pri0248F.1_g01000.1	ARO1	40.645	6.21643		AT4G34940.1	armadillo repeat only 1	0
Dlo_pri0056F.1_g03770.1		11.185	2.32179		AT4G10955.1	alpha/beta-Hydrolases superfamily protein	1.97e-95
Dlo_pri0775F.1_g00360.1		7.675	0.443929		AT3G48400.1	Cysteine/Histidine-rich C1 domain family protein	5.23e-12
Dlo_pri0856F.1_g00210.1	CYP94B3	17.795	2.55821		AT3G48520.1	cytochrome P450, family 94, subfamily B, polypeptide 3	0
Dlo_pri0257F.1_g00300.1		1.79	0.0385714		AT4G12010.1	Disease resistance protein (TIR-NBS-LRR class)	4.1e-166
Dlo_pri0061F.1_g03110.1		16.045	3.14179		AT5G45120.1	Eukaryotic aspartyl protease family protein	0
Dlo_pri0018F.1_g02750.1		28.355	5.35571		AT4G19810.1	Glycosyl hydrolase family protein with chitinase insertion	3.32e-94
Dlo_pri0205F.1_g00730.1		16.43	3.13107		AT1G14430.1	glyoxal oxidase-related protein	0
Dlo_pri0209F.1_g00560.1	TMK4	26.095	4.60714		AT3G23750.1	Leucine-rich repeat protein kinase family protein	0
Dlo_pri0236F.1_g00430.1	SIP1	27.78	4.24536		AT5G40390.1	Raffinose synthase family protein	9.3e-165
Dlo_pri0071F.1_g03850.1		20.785	4.66		AT1G60360.1	RING/U-box superfamily protein	3.25e-72
Dlo_pri0281F.1_g00130.1		14.7	2.01357		AT2G22590.1	UDP-Glycosyltransferase superfamily protein	1.16e-129
Dlo_pri0000F.1_g05660.1		7.095	1.1675		AT3G17850.1	Protein kinase superfamily protein	8.45e-97
Dlo_pri0155F.1_g01600.1		26.29	4.78821		AT2G04220.1	Plant protein of unknown function (DUF868)	1.3e-128
Dlo_pri0042F.1_g02140.1		23.595	4.30821		AT5G66440.1	unknown protein	4.88e-12
Dlo_pri0882F.1_g00100.1		779.065	33.4354		Nohits
Dlo_pri2124F.1_g00010.1		7.015	0.292143		Nohits
Dlo_pri0188F.1_g01920.1	KCS4	20.07	4.48714		AT1G19440.1	3-ketoacyl-CoA synthase 4	1.34e-114
Dlo_pri0373F.1_g00950.1	AMT11	26.185	4.05357		AT4G13510.1	ammonium transporter 11	1.69e-99
Dlo_pri0259F.1_g01430.1	ATC	88.705	16.1921		AT2G27550.1	centroradialis	8.52e-94
Dlo_pri0048F.1_g04500.1		48.695	8.6775		Nohits
Dlo_pri0053F.1_g02580.1	ATSUV3	0	4.97143		AT4G14790.1	ATP-dependent RNA helicase, mitochondrial (SUV3)	3.28e-102
Dlo_pri0047F.1_g02790.1		0	6.03214		AT3G62120.1	Class II aaRS and biotin synthetases superfamily protein	6.84e-55
Dlo_pri0251F.1_g00060.1		0	7.38893		AT1G58025.2	DNA-binding bromodomain-containing protein	8.37e-20
Dlo_pri0184F.1_g00770.1	ILA	0	6.08964		AT1G64790.2	ILITYHIA	2.17e-60
Dlo_pri0082F.1_g01440.1		1.93	11.8636		AT4G37190.1	Beta tubulin, autoregulation binding	5.27e-88
Dlo_pri0006F.1_g08130.1		1.765	21.8664		AT5G18610.1	Protein kinase superfamily protein	3.56e-83
Dlo_pri0151F.1_g00220.1		0	7.25286		Nohits
Dlo_pri1161F.1_g00130.1		0	19.1639		Nohits
Dlo_pri0979F.1_g00160.1		0	6.28357		AT3G01680.1	unknown protein	8.1e-16
Dlo_pri0020F.1_g07770.1	REV1	0	7.80857		AT5G44750.2	DNA-directed DNA polymerases	1.6e-32
Dlo_pri0060F.1_g01680.1		0	6.31929		AT5G64500.1	Major facilitator superfamily protein	2.24e-36
Dlo_pri0196F.1_g00900.1		0.935	8.2175		AT1G06560.1	NOL1/NOP2/sun family protein	3.47e-167
Dlo_pri0198F.1_g00580.1		0	2.12464		AT5G43745.1	Protein of unknown function (DUF1012)	1.74e-80
Dlo_pri0022F.1_g04950.1		0	5.3875		AT2G35990.1	Putative lysine decarboxylase family protein	6.48e-36
Dlo_pri0163F.1_g02050.1	ULP1B	0	3.58143		AT4G00690.1	UB-like protease 1B	3.02e-12
Dlo_pri0097F.1_g02390.1	ATGSL08	1.29	11.6564		AT2G36850.1	glucan synthase-like 8	2.19e-168
Dlo_pri0822F.1_g00260.1	ATKRS-1	0	16.8607		AT3G11710.1	lysyl-tRNA synthetase 1	3.35e-37
Dlo_pri0178F.1_g00940.1	P5CS2	0.33	8.175		AT3G55610.1	delta 1-pyrroline-5-carboxylate synthase 2	6.69e-76
Dlo_pri0226F.1_g00060.1		0.425	6.80964		AT1G10490.1	Domain of unknown function (DUF1726)	0
Dlo_pri2020F.1_g00030.1	EDR2	0	4.39036		AT4G19040.2	ENHANCED DISEASE RESISTANCE 2	1.21e-121
Dlo_pri0545F.1_g00250.1		1.845	11.3307		AT5G17680.1	disease resistance protein (TIR-NBS-LRR class)	1.6e-113
